# Supplementary material for: Predicting death from COVID-19 using pre-existing conditions: implications for vaccination triage
Source: PubMed Central journal article supplement — BMJ Open Respir Res. 2021 Dec 22;8(1):e001016. doi: 10.1136/bmjresp-2021-001016 (PMC8705216; doi:10.1136/bmjresp-2021-001016), 2021-12-22
Supplement: bmjresp-2021-001016supp001.pdf [file bmjresp-2021-001016supp001.pdf]

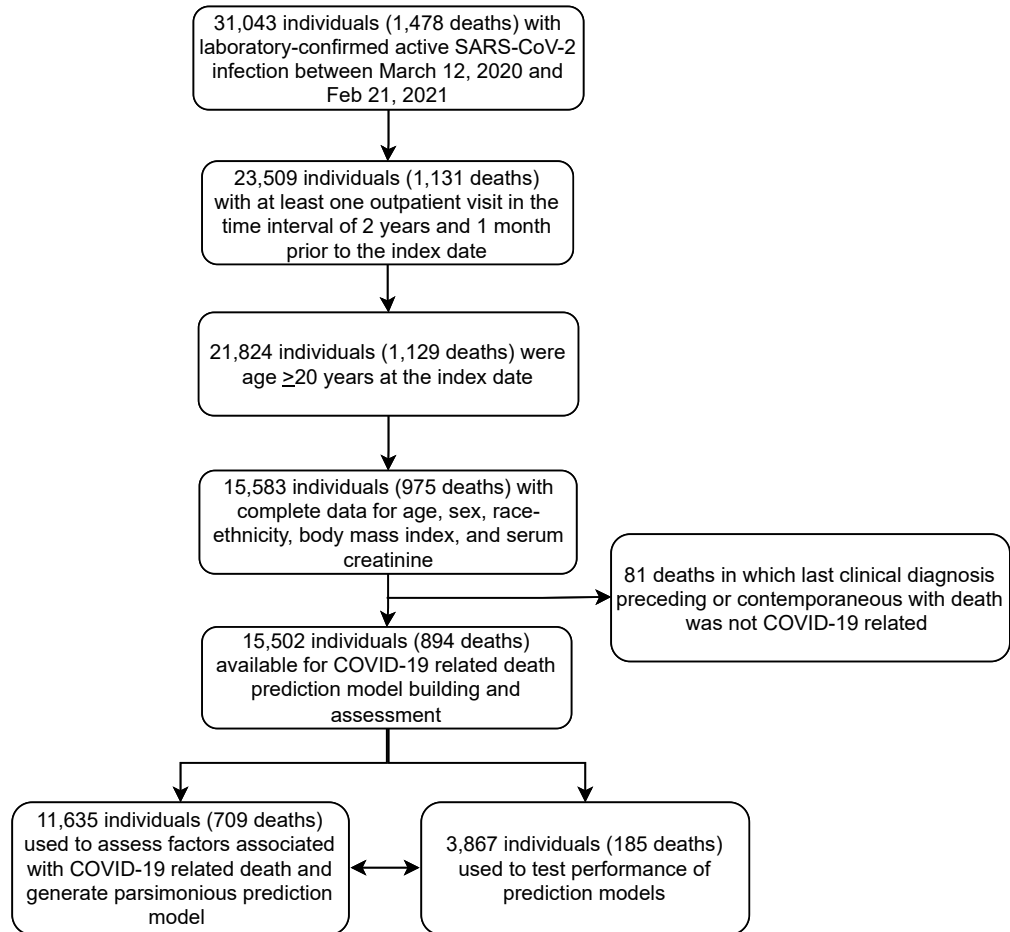

**Figure S1.** Flow chart demonstrating how the final analytic set of individuals with laboratory confirmed SARS-CoV-2 was selected, as well as the numbers used for prediction model development and testing.
