# Supplementary material for: Predicting death from COVID-19 using pre-existing conditions: implications for vaccination triage
Source: PubMed Central journal article supplement — BMJ Open Respir Res. 2021 Dec 22;8(1):e001016. doi: 10.1136/bmjresp-2021-001016 (PMC8705216; doi:10.1136/bmjresp-2021-001016), 2021-12-22
Supplement: bmjresp-2021-001016supp002.pdf [file bmjresp-2021-001016supp002.pdf]

**Table S1. Clinical variables not retained for input into LASSO regression for predicting COVID-19 related death**

| Clinical Variable                                         | Screening clinical diagnoses (FDR adjusted P-value)* |
|-----------------------------------------------------------|------------------------------------------------------|
| Infectious disease: HIV                                   | 0.054                                                |
| Oncologic: proliferative disorders                        | 0.056                                                |
| Oncologic: leukemia, lymphoma, myelodysplastic syndrome   | 0.061                                                |
| Infectious disease: osteomyelitis                         | 0.079                                                |
| Endocrine and metabolism: hypercholesterolemia            | 0.092                                                |
| Cardiovascular: cardiac arrest or ventricular tachycardia | 0.102                                                |
| Endocrine and metabolism: thyroid disease                 | 0.102                                                |
| Psychiatric and substance use: eating disorder            | 0.122                                                |
| Psychiatric and substance use: schizophrenia              | 0.122                                                |
| General: pain                                             | 0.164                                                |
| Musculoskeletal: skeletal spine disease                   | 0.219                                                |
| Oral dental: oral problems                                | 0.254                                                |
| Neurologic: autonomic neuropathy                          | 0.256                                                |
| Rheumatologic: autoimmune disease                         | 0.264                                                |
| Infectious disease: bronchitis                            | 0.277                                                |
| Rheumatologic: gout                                       | 0.296                                                |
| Neurologic: headaches                                     | 0.312                                                |
| Gastrointestinal: gallbladder disease                     | 0.407                                                |
| General: obstructive sleep apnea                          | 0.413                                                |
| Congenital: malformation                                  | 0.447                                                |
| Rheumatologic: vasculitis                                 | 0.475                                                |
| Infectious disease: infectious hepatitis B or C           | 0.484                                                |
| Psychiatric and substance use: suicide or self-harm       | 0.500                                                |
| Endocrine and metabolism: adrenal insufficiency           | 0.505                                                |
| General: living assistance                                | 0.505                                                |
| Musculoskeletal: osteoporosis                             | 0.713                                                |
| Neurologic: vision loss                                   | 0.713                                                |
| Gastrointestinal: irritable bowel disorder                | 0.758                                                |
| Hematologic: hemoglobinopathy                             | 0.758                                                |
| Infectious disease: influenza                             | 0.758                                                |
| Gastrointestinal: Inflammatory bowel disease              | 0.859                                                |
| Rheumatologic: inflammatory arthritis                     | 0.865                                                |
| Allergy: atopic conditions, not otherwise specified       | 0.876                                                |
| Neurologic: hearing loss                                  | 0.918                                                |
| Psychiatric and substance use: attention deficit disorder | 0.940                                                |
| Allergy: allergic rhinitis                                | 0.990                                                |
| Pulmonary: asthma                                         | 0.990                                                |
| Gastrointestinal: appendicitis                            | 0.990                                                |
| General: hypertension                                     | 0.990                                                |
| Infectious disease: meningitis, encephalitis, myelitis    | 0.990                                                |

|                                                  |       |
|--------------------------------------------------|-------|
| Infectious disease: sexually transmitted disease | 0.990 |
| Infectious disease: syphilis                     | 0.990 |

LASSO denotes least absolute shrinkage and selection operator; COVID-19, coronavirus disease 2019; FDR, false discovery rate; and HIV, human immunodeficiency virus.

\*P-values are adjusted for the false discovery rate. Each clinical variable is separately adjusted by the following model: COVID-19 death ~ age + sex + race-ethnicity + smoking status + BMI + serum creatinine + clinical variable.
